# Supplementary material for: In situ quantification of individual mRNA transcripts in melanocytes discloses gene regulation of relevance to speciation
Source: Oxford University Press journal article supplement (doi:10.1242/jeb.194431), 2019-01-01
Supplement: jeb194431supp.pdf [file jeb194431supp.pdf]

## SUPPLEMENTARY MATERIAL

## SUPPLEMENTARY TABLES

**Table S1.** Information on crow individuals used in the study

(Note: CC: *C. (corone) corone*; HC: *C. (corone) cornix*; T: torso, H: head; T-500: cross section at 500  $\mu\text{m}$  above the dermal papilla; T-1000: cross section at 1000  $\mu\text{m}$  above the dermal papilla; Ko: Konstanz, Germany; Up: Uppsala, Sweden; NA: not available)

| individual | species | country | sex    | sampling date | age [days] at sampling | nest         | longitude | latitude | cross section analyses | longitudinal analyses | feather collecting | ringNr or altLabel |
|------------|---------|---------|--------|---------------|------------------------|--------------|-----------|----------|------------------------|-----------------------|--------------------|--------------------|
| D_Ko_C27   | CC      | Germany | female | 6.5.2014      | 19                     | D_Ko2014_N08 | 47.6702   | 9.1751   | T-1000, T-500          | H, T                  | 8.2015, 8.2016     | HF77356            |
| D_Ko_C29   | CC      | Germany | female | 6.5.2014      | 14                     | D_Ko2014_N04 | 47.7123   | 9.0835   | H-1000                 |                       | 8.2015             | HF77358            |
| D_Ko_C31   | CC      | Germany | male   | 6.5.2014      | 21                     | D_Ko2014_N03 | 47.7217   | 9.0698   | T-1000, T-500, H-1000  | H, T                  | 8.2015             | HF77360            |
| D_Ko_C36   | CC      | Germany | male   | 7.5.2014      | 16                     | D_Ko2014_N35 | 47.6673   | 9.2167   | T-1000, T-500          | H, T                  | 8.2015             | HF77365            |
| D_Ko_C40   | CC      | Germany | male   | 7.5.2014      | 19                     | D_Ko2014_N36 | 47.6660   | 9.2138   | H-1000, H-500          |                       | 8.2015             | HF77369            |
| D_Ko_C58   | CC      | Germany | female | 9.5.2014      | 19                     | D_Ko2014_N17 | 47.6810   | 9.1738   | H-500                  |                       | 8.2015             | HF77388            |
| D_Ko_C59   | CC      | Germany | female | 9.5.2014      | 21                     | D_Ko2014_N18 | 47.6808   | 9.1758   | H-500                  |                       | 9.2015             | HF77389            |
| S_Up_H59   | HC      | Sweden  | male   | 20.5.2014     | <30                    | S_Up2014_N16 | 17.5091   | 59.9498  | H-500                  |                       | 8.2015, 8.2016     | 80043805           |
| S_Up_H60   | HC      | Sweden  | female | 20.5.2014     | <30                    | S_Up2014_N02 | 17.5643   | 59.8916  | T-1000, T-500, H-1000  | H, T                  | 8.2015             | 80043804           |
| S_Up_H65   | HC      | Sweden  | female | 22.5.2014     | <30                    | S_Up2014_N18 | 17.5324   | 59.9087  | T-1000, T-500, H-500   | H, T                  | 8.2015             | 80043811           |
| S_Up_H69   | HC      | Sweden  | female | 25.5.2014     | 25                     | S_Up2014_N25 | 17.6695   | 60.0341  | T-1000, T-500, H-1000  | H, T                  | 8.2015             | 80043810           |
| S_Up_H77   | HC      | Sweden  | male   | 25.5.2014     | 23                     | S_Up2014_N06 | 17.5936   | 59.9137  | H-1000                 |                       | 8.2015             | 80043813           |

## SUPPLEMENTARY FIGURES

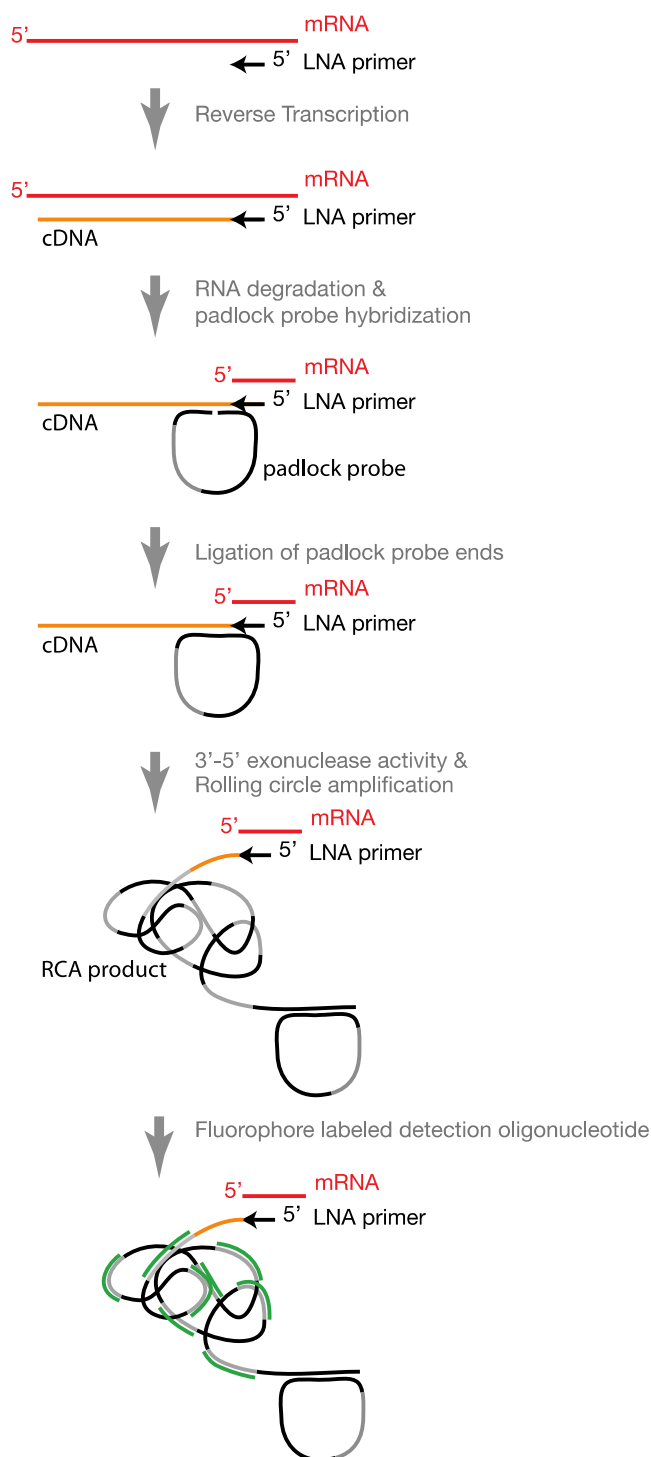

**Figure S1:** Schematic representation of the major processes of *in situ* mRNA quantification via padlock probe and rolling circle amplification. LNA primer (arrow in black): locked nucleic acid primer; strand in red: targeted native mRNA molecule; strand in orange: cDNA molecule; segment in grey: DNA region for the hybridization of fluorophore labeled detection oligonucleotides; strand in green: fluorophore labeled detection oligonucleotide.

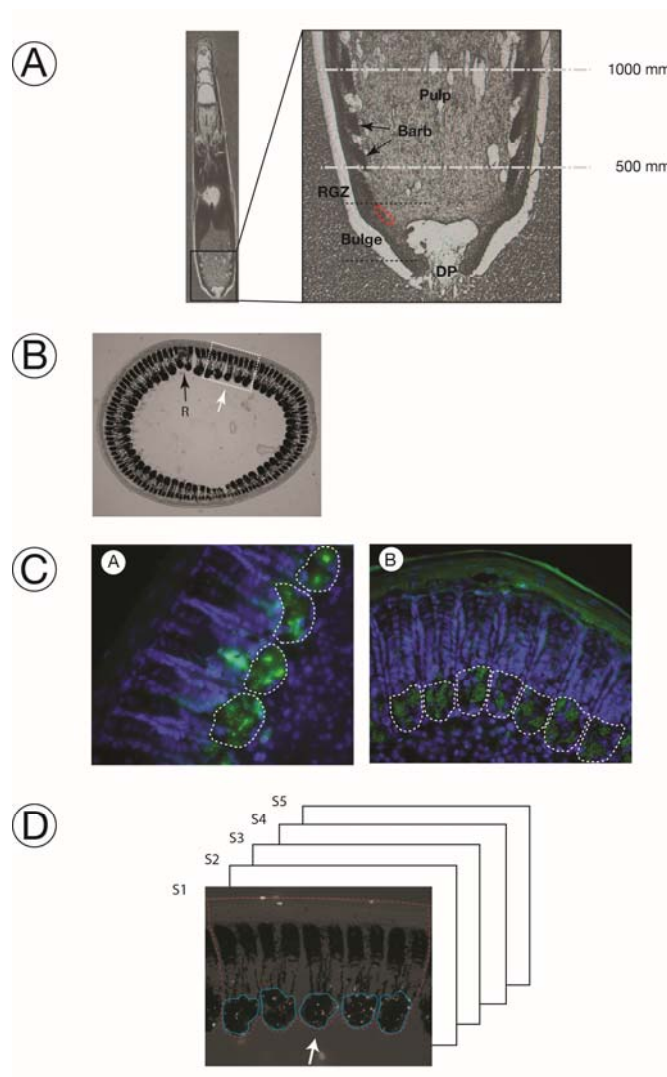

**Figure S2:** Description of the data set for mRNA *in situ* quantification

**A)** Longitudinal section of a carrion crow torso follicle indicating the location of cross sections at 500  $\mu\text{m}$  and 1000  $\mu\text{m}$  from the proximal end. DP: dermal papilla; RGZ: ramogenic zone; Dashed-line ellipse in red: collared bulge (CB). **B)** Example of a cross section indicating the location of five consecutive barb ridges (in white dashed-line square) next to the rachis used for *in situ* mRNA quantification (also see panel D). R: rachis. **C)** Histological definition of the barb ridge growth zone consisting predominantly of melanocytes (dotted lines). Images A and B represent cross-sections at 500  $\mu\text{m}$  and 1000  $\mu\text{m}$  from the distal end respectively. Melanocytes are visualized by immunostaining against the TYRP1 protein in green; nuclei stained with Hoechst 33342 are shown in blue. **D)** Example of five serial cross sections at 1000  $\mu\text{m}$  above DP with *in situ* stained mRNA of the TYRP1 gene (white dots) forming the basis for melanocyte-specific mRNA quantification and statistical inference. The area enclosed in a red dashed line is for quantifying representing overall expression of mRNA transcripts on the given section (except cells in the pulp). The area on a given section for quantifying melanocyte-specific mRNAs is enclosed with light-blue line. The white arrow indicates the middle of selected five consecutive barb ridges as a reference across five sequential sections.

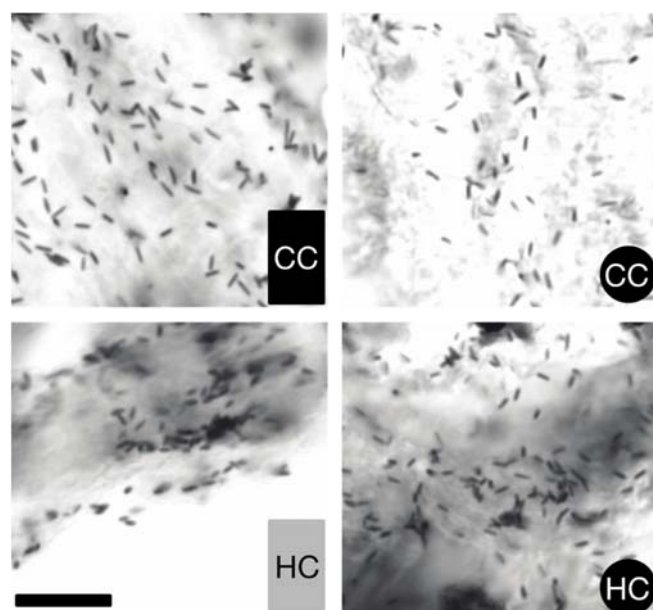

**Figure S3:** Images of separated melanosomes from barbule cells of carrion crow (CC) and hooded crow (HC) head (right) and torso (left). Each black, rod-shaped structure represents a mature melanosome packed with eumelanin. Symbol shape indicates sampling location on the body (circle: head, rectangle: torso); symbol colour imitates pigmentation intensity of the mature feather.; bar = 10  $\mu$ m.

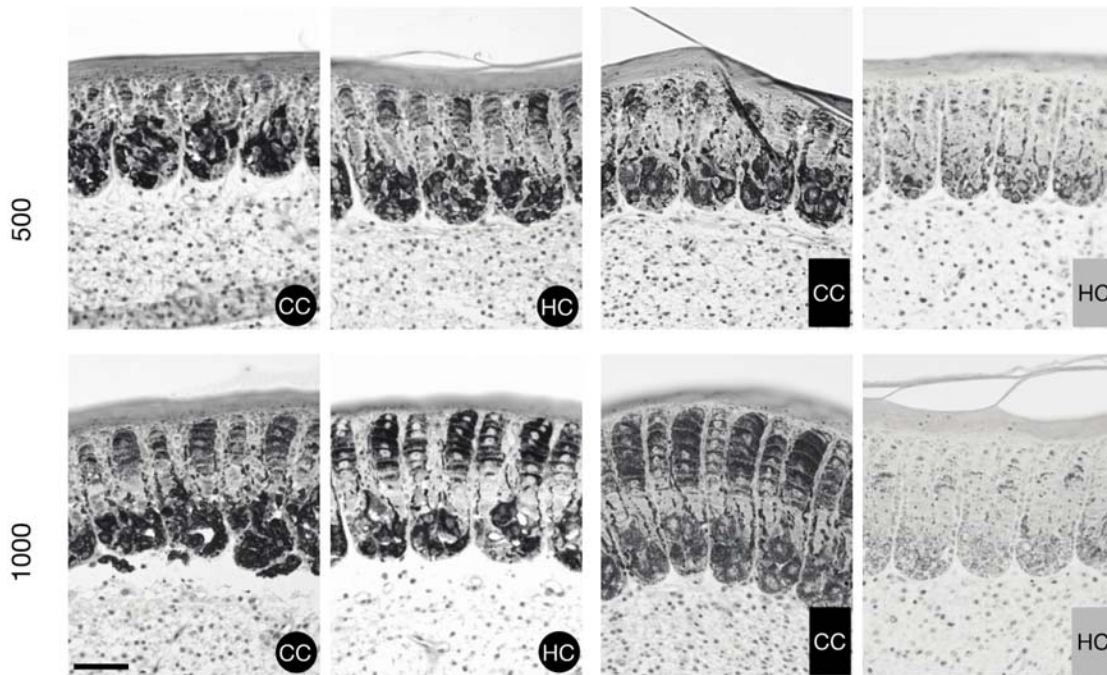

**Figure S4:** Cross-section images from ensheathed feather follicles at 500  $\mu\text{m}$  (upper row) and 1000  $\mu\text{m}$  (lower row) above the dermal papilla of carrion crows (CC) and hooded crows (HC). Shown are examples of the fourth or fifth barb ridge (in the middle) posterior from the rachis. Follicles were sampled from the head region and on the ventral part of the torso. Symbol shape indicates sampling location on the body (circle: head, rectangle: torso); symbol colour imitates pigmentation intensity of the mature feather; bar = 50  $\mu\text{m}$ .

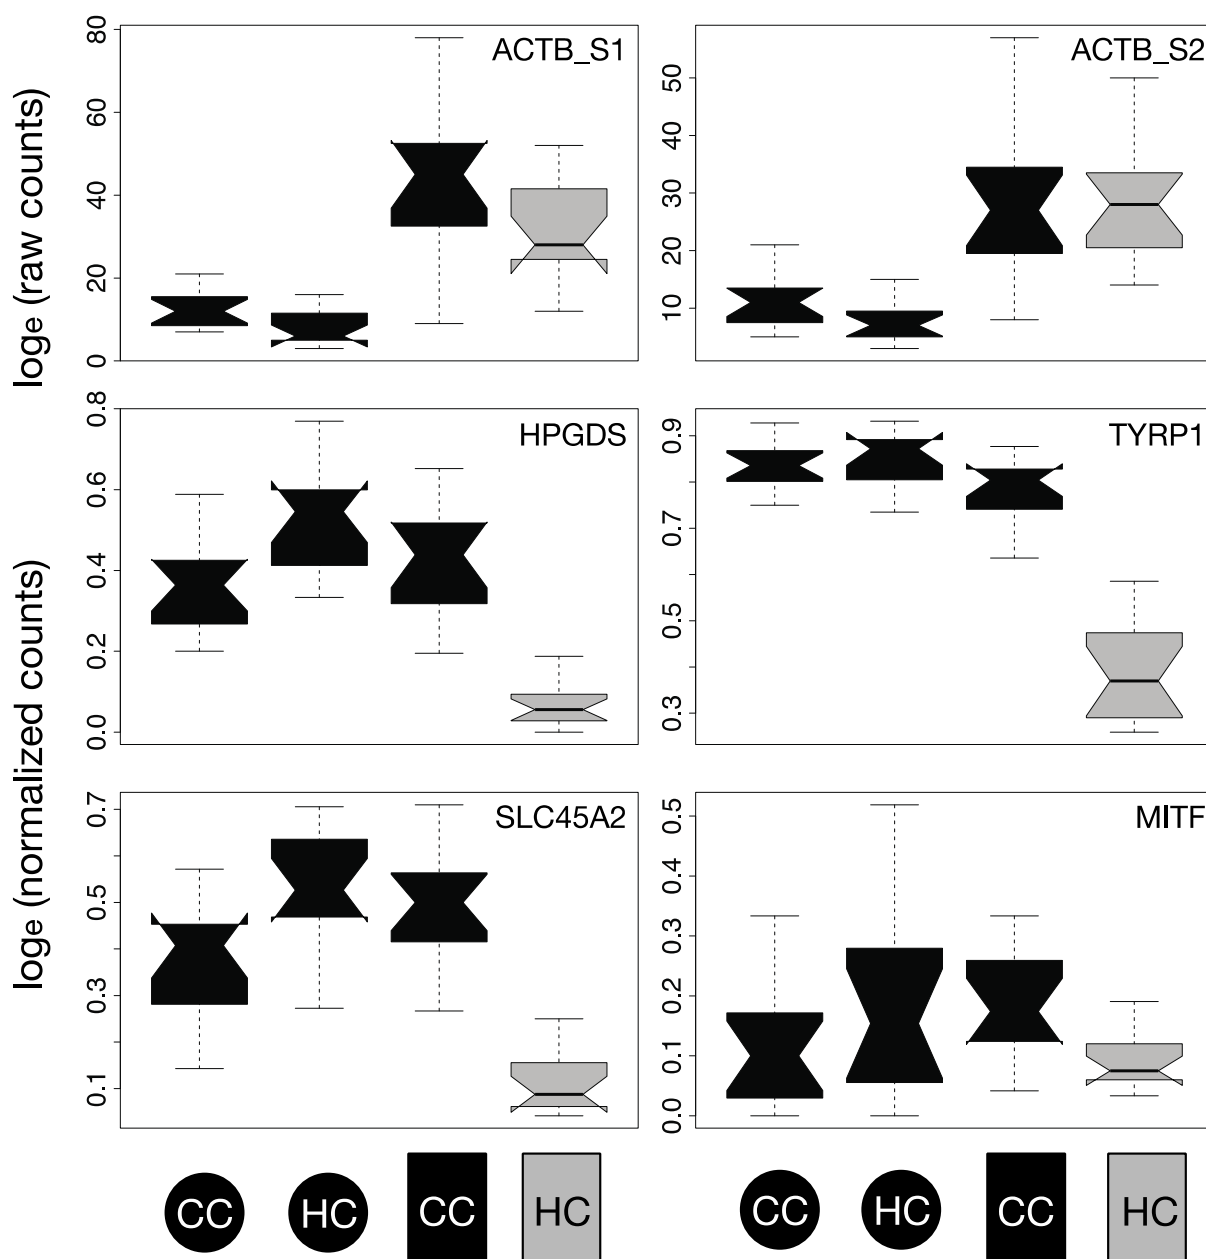

**Figure S5:** Notched boxplot of raw counts (ACTB gene) or normalized *in situ* RCA signals of targeted mRNA transcripts (HPGDS, SLC45A2, TYRP1, MITF) in melanocytes at 1000  $\mu$ m above the dermal papilla of head and torso in carrion crow (CC) and hooded crow (HC). Symbol shape indicates sampling location on the body (circle: head, rectangle: torso); symbol colour imitates pigmentation intensity of the mature feather. ( $n = 30$ )

## SUPPLEMENTARY MOVIES

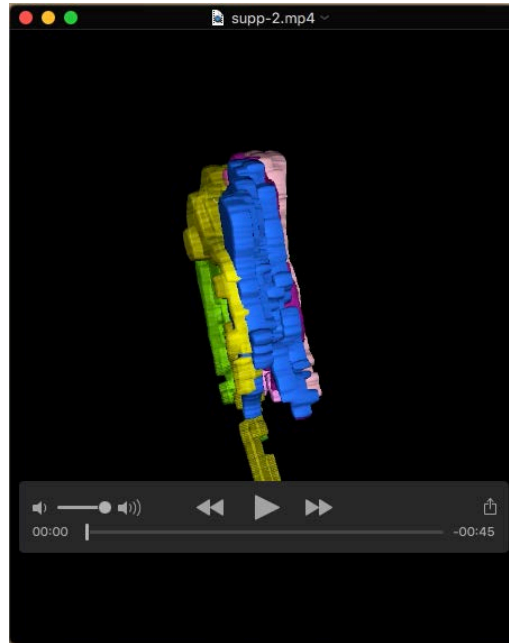

**Movie 1.** Three-dimensional reconstruction of melanocytes, presenting in the ventral (top) to dorsal (bottom) direction. Each object of the same color represents a melanocyte. Spherical objects in yellow within melanocytes represent their nuclei. Major portion of a melanocyte where its nucleus locates is within the growth zone of barb ridges, and dendritic cytoplasm extends toward down to barbule plate (not shown).

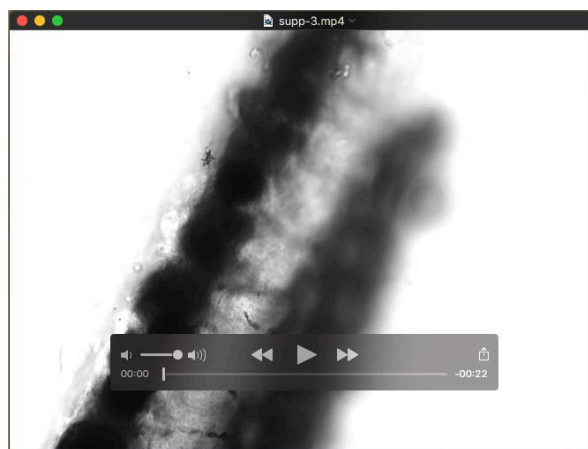

**Movie 2.** A whole-mounted barb of carrion crows (CC) in PBS showing dendritic cytoplasm filled with black melanosome of eumelanin connecting from ramus (on the left) to barbule plate (on the right).
